# Supplementary material for: Oleacein Intestinal Permeation and Metabolism in Rats Using an In Situ Perfusion Technique
Source: MDPI journal article supplement (doi:10.3390/pharmaceutics13050719), 2021-05-14
Supplement: s1 [file s1]

# Supplementary Materials: Oleacein Intestinal Permeation and Metabolism in Rats Using an In Situ Perfusion Technique

Lastname Anallely López-Yerena, Maria Pérez, Anna Vallverdú-Queralt, Eleftherios Miliarakis, Rosa M. Lamuela-Raventós and Elvira Escribano-Ferrer

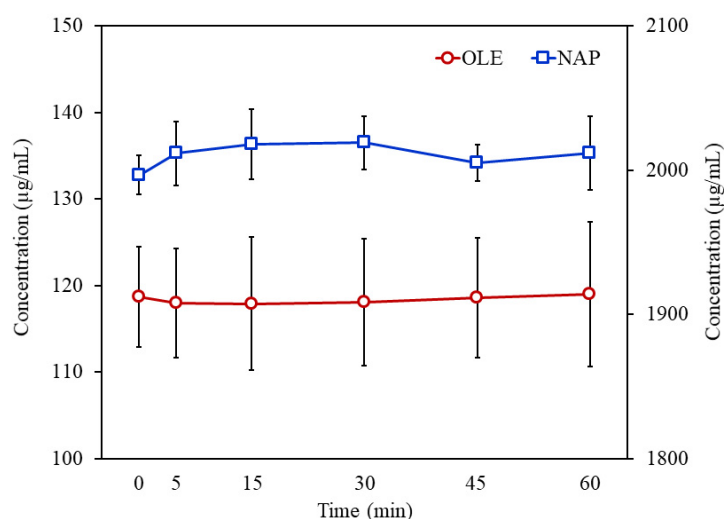

**Figure S1.** Concentration of NAP (right Y-axis scale) and OLEA (left Y-axis scale) in the TM and 37°C as a function of time in the stability study.

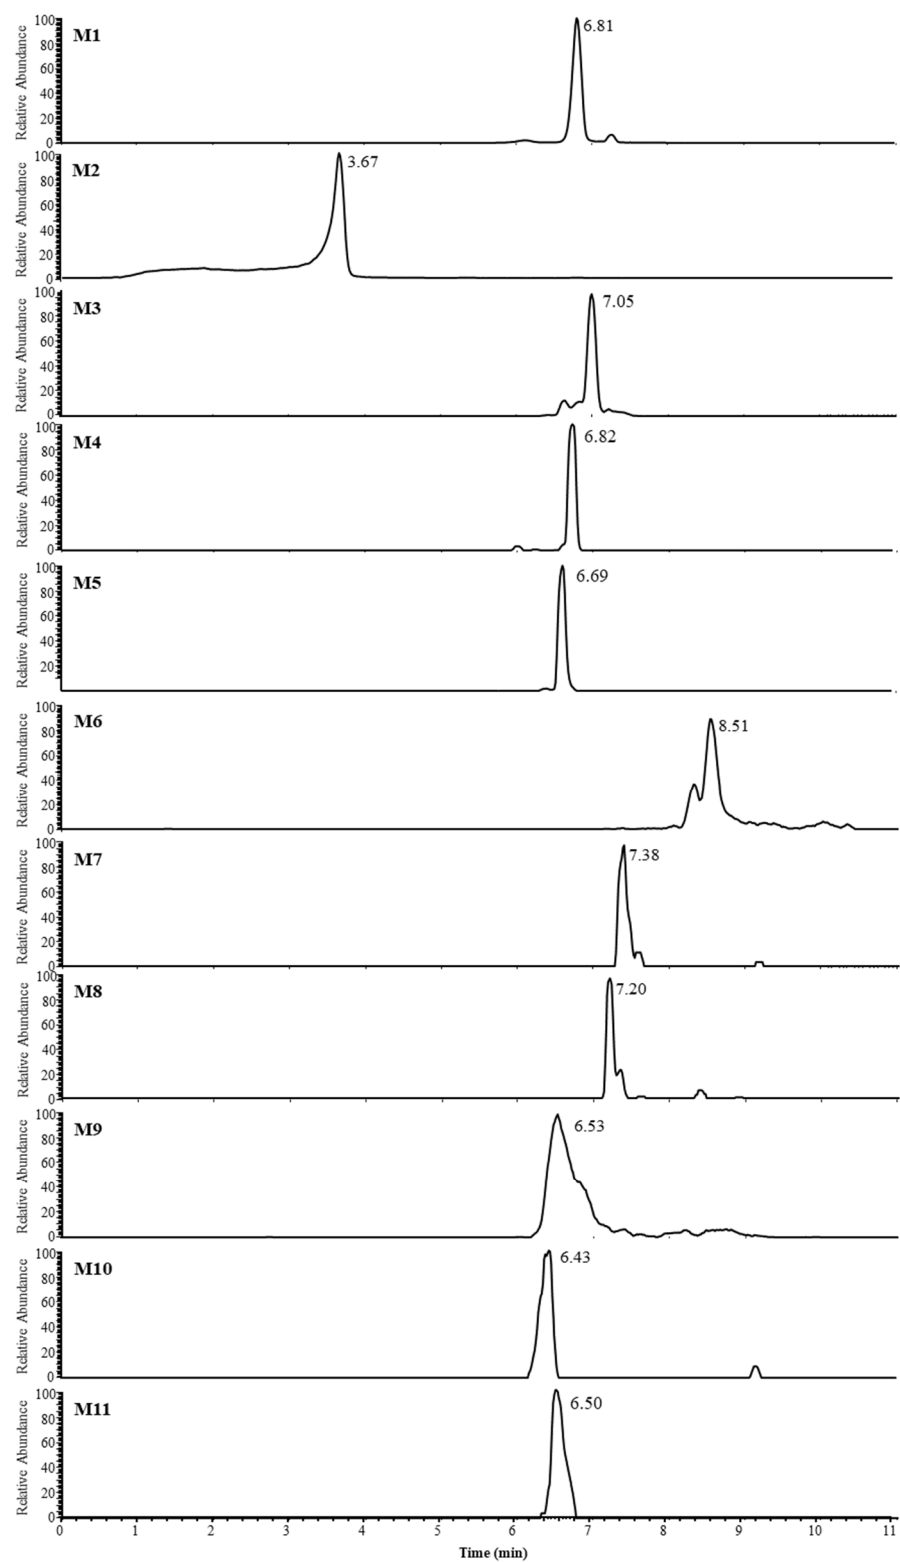

**Figure S2.** Chromatogram and retention time of OLEA and its metabolites.

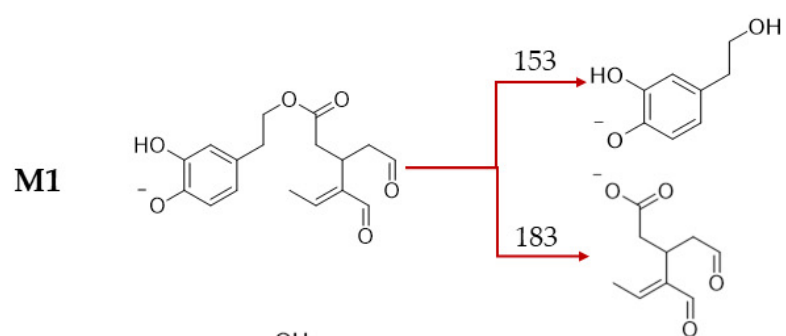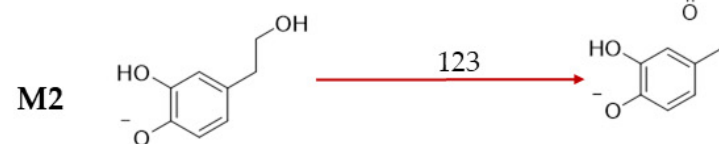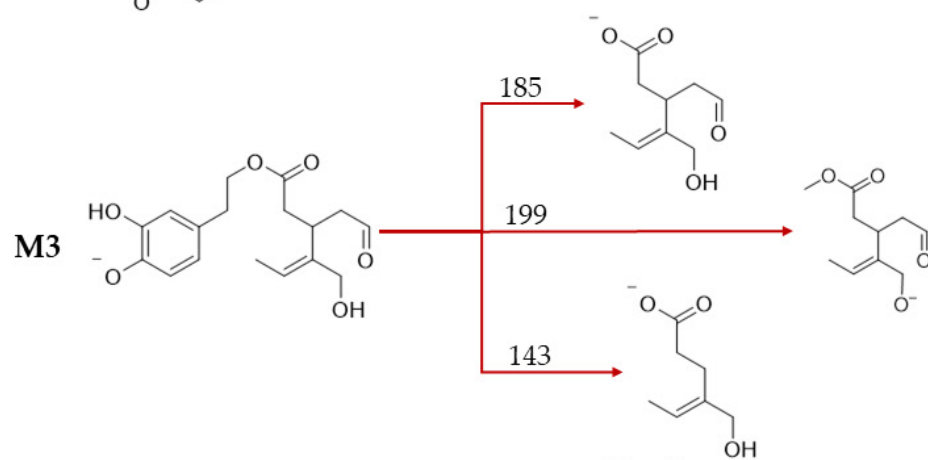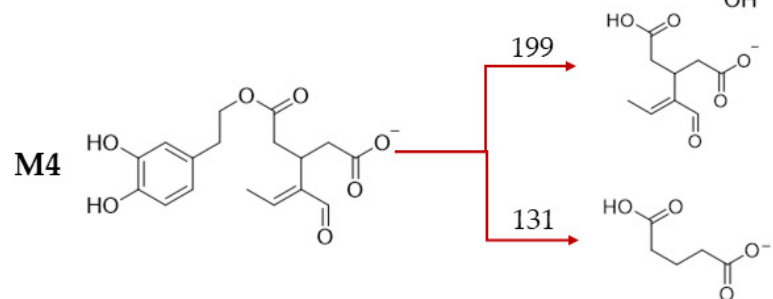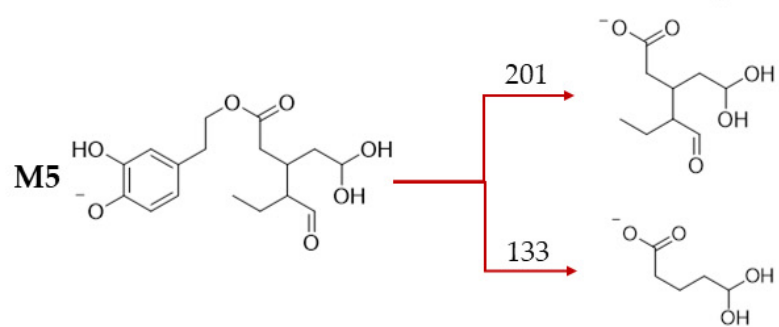

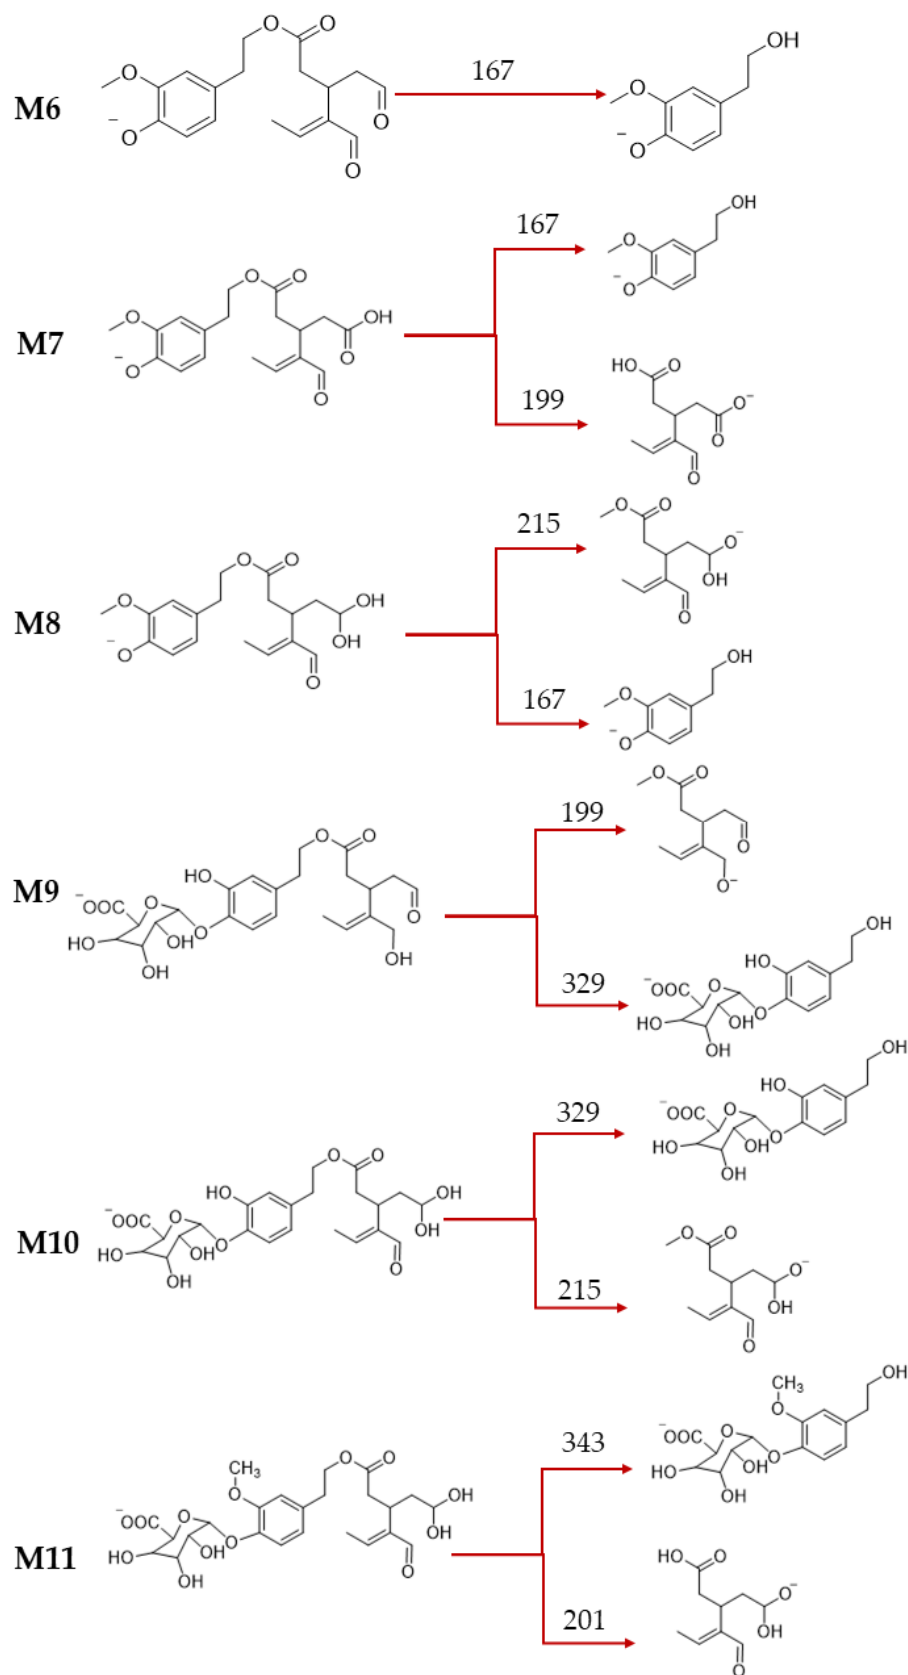

**Figure S3.** Molecular structure of OLEA and derivatives and proposed fragments with their masses through LQT-Orbitrap-MS analysis.
